# Supplementary material for: Construction and clinical application of a quality evaluation index system for digital intraoral impression scanning
Source: Research Square preprint supplement (doi:10.21203/rs.3.rs-6903044/v1), 2025-07-22
Supplement: Supplementary file 1 [file 35cb2e52e7b6afd346c070ae.xlsx]

## Sheet: 评价指标表
	Summary Table of Evaluation Indicators
Serial Number	Indicator	Evaluator	Method	Dimension	Specific Indicator
1	Oral Scanning Time	Oral Scanning Nurse	Check From	Record the scanning time truthfully	The average oral scanning time
2	Scanning Data Qualification Rate	Technician	Technician Evaluation Form for Impression Scanning Quality	Five dimensions: data integrity, data accuracy, data clarity, data distortion - free, oral scanning range	Data integrity; no ghosting or misalignment; no undercuts or bubbles; no distortion; complete and clear margins near the adjacent surfaces and gingival margins; accurate restoration contact relations; stable occlusion; impression scope meeting the requirements of restoration types; the number of images ≤ 1500
3	Patient Satisfaction Degree	Patient	Patient Satisfaction Evaluation Form for Impression Scanning	Five Likert-scale items: Oral scanning environment and facilities, Oral scanning experience, Infection control, Health education, Nursing services	Please refer to the Patient Satisfaction Evaluation Form for details.
