# Supplementary material for: Construction and clinical application of a quality evaluation index system for digital intraoral impression scanning
Source: Research Square preprint supplement (doi:10.21203/rs.3.rs-6903044/v1), 2025-07-22
Supplement: Supplementary file 2 [file 9a6d03241914ae5eb825d962.xlsx]

## Sheet: 患者满意度评价表
Patient Satisfaction Evaluation Form for Oral Impression Scanning
serial No.	dimension	weight	Score (Before Intervention)	Score (After Intervention)
1	Scanning environment and Facilities	0.2	4.7	4.97
2	Scanning feeling	0.3	4.61	4.95
3	Infection and Control	0.2	4.86	4.97
4	Health Education	0.1	4.59	4.62
5	Nursing Service	0.2	4.83	4.91
6	Patient Satisfaction Score		0.944	0.982
Note: This patient satisfaction questionnaire adopts a 5-point scoring system and a weighted average calculation method: (1) Before the intervention: The patient satisfaction score = (0.2 * 4.7 + 0.3 * 4.61 + 0.2 * 4.86 + 0.1 * 4.59 + 0.2 * 4.83) * 20 = 94.4， The patient satisfaction rate = 94.4 * 100% = 94.4%. (2) After the intervention: The patient satisfaction score = (0.2 * 4.97 + 0.3 * 4.95 …
