# Supplementary material for: Construction and clinical application of a quality evaluation index system for digital intraoral impression scanning
Source: Research Square preprint supplement (doi:10.21203/rs.3.rs-6903044/v1), 2025-07-22
Supplement: Supplementary file 3 [file baf55f1b46bdda3378efa6e6.docx]

**数字化印模口内扫描操作评分表**

| **项目** | **内 容** | **扣分标准** | **扣分** |
| --- | --- | --- | --- |
| **定义**  **(3分)** | 数字化口扫技术是通过口内扫描仪配合3D打印，用口腔扫描仪对患者的口腔进行扫描，从而获取精准的口腔数据，从而生产出相应的齿科产品，应用到患者身上。 | 提问未掌握(3分) |  |
| **用途**  **(3分)** | 数字化在电脑上呈现完整的牙齿排列，方便正畸、修复、种植等临床操作牙齿前后对照、数据收集及义齿制作。 | 提问未掌握(3分) |  |
| **用物**  **(6分)** | 口扫车、扫描仪、扫描头、扫描枪、电源适配器、电源线、防污膜、吸唾管、干棉球、气枪、治疗三件套、水杯、胸巾、肾上腺素、双氧水 | 用物准备不齐全(3分)  未核对物品名称、有效期 ( 3 分） |  |
| **操作前**  **(18分)** | ①环境准备：整洁、明亮、安全、舒适 | 环境准备不规范(3分) |  |
| ②标准预防：衣帽整洁—洗手(按七步洗手法)一戴口罩 | 标准预防不规范(3分) |  |
| ③**扫描仪准备**：录入患者信息、开机、连接口扫头、预热、镜头干净，预热，粘贴防污膜，准备无菌物品。**患者准备：**告知患者操作目的、教会患者配合方法，取得患者同意；**椅位准备：**粘贴防污膜、调整椅位；**操作者准备：**戴面屏、戴手套 | 镜头有污渍、口扫头未预热（4分）未告知患者相关注意事项（4分）未调整口扫椅位（4分） |  |
| **操作中**  **(58分)** | ①检查：核对患者信息及扫描牙位 | 未核对信息及牙位(2分) |  |
| ②调整牙椅位置、避开牙椅灯光，清洁牙面，充分吸唾、止血，做好隔湿 | 未清洁牙面或隔湿(2分)  未及时吸唾或止血（2分）未避开牙椅灯光（2分） |  |
| ③适时安抚并与患者沟通，做好心理疏导 | 未安抚患者（5分） |  |
| ④**扫描步骤：**扫描工作模型数据；扫描对颌模型数据；扫描咬合数据。**扫描质量标准：**数据清晰、无气泡、水渍、无错层、无倒凹、数据完整：预备体邻面及近龈缘处肩台完整、邻近牙、牙槽骨等周围组织印模完整；数据无畸变；数据准确：修复体的邻接关系准确、咬合正确 | 扫描顺序倒置、间断、多次暂停(3分)有唾液或气泡（3分）边缘不清晰（3分）数据变形（3分）边缘线以下黏膜组织预留不足（3分）扫描错层(3分）咬合不稳定(3分)有倒凹（3分） |  |
| ⑤检查扫描图像质量是否符合要求 | 未检查数据(5分) |  |
| ⑥模型优化数据导出与发送 | 数据发送不及时(5分)  数据导出错误（5分） |  |
| ⑦要点：  a全过程遵循无菌操作技术  b操作熟练 | 违反无菌原则(3分)  操作流程不熟练(3分) |  |
| **操作后**  **(15分 )** | ①协助患者整理面容 | 未协助患者整理面容(5分) |  |
| ②整理用物：口扫车使用完毕及时归位，用物按要求存放，保持清洁 | 整理用物不规范(5分) |  |
| ③个人防护：脱手套洗手脱口罩。 | 标准预防不规范(5分) |  |
| **合计** |  |  |  |
